# Supplementary material
Source: HighWire-hosted journal article supplement (https://www.qdcxjkg.com/highwire/filestream/113375/field_highwire_adjunct_files/0/Table_S1.pdf)
Supplement: Table_S1.pdf [file Table_S1.pdf]

| Case   | Sex | Age at resection | Localisation 1st tumor | Localisation 2nd tumor | TNM (7th edition) before clonality assessment | Localisation of distant metastases | UICC stage before clonality assessment | TNM (7th edition) after clonality assessment | Status (0=alive; 1=dead) | Survival (months) | Smoking status | Pack years |
|--------|-----|------------------|------------------------|------------------------|-----------------------------------------------|------------------------------------|----------------------------------------|----------------------------------------------|--------------------------|-------------------|----------------|------------|
| ADC 1  | m   | 53               | LLL                    | LLL                    | ypT4, ypN0, yM1b                              | brain                              | IV                                     | ypT3, ypN0, yM1b / ypT1a, ypN0, yM1b         | 0                        | 0,3               | Smoker         | n.i.       |
| ADC 2  | f   | 58               | RLL                    | RLL                    | pT3, pN2, M1b                                 | brain                              | IV                                     | pT3, pN2, pMx / pT1a, pN2, M1b               | 0                        | 10,7              | Ex-Smoker      | 20         |
| ADC 3  | f   | 62               | LLL                    | LLL                    | pT3, pN2, pMx                                 | none                               | IIIA                                   | pT3, pN2, pMx / pT2a, pN2, pMx               | 0                        | 0,7               | Smoker         | 40         |
| ADC 4  | f   | 61               | RUL                    | RUL                    | pT4, pN1, pMx                                 | none                               | IIIA                                   | pT1b, pN1, pMx / pT1a, pN1, pMx              | 1                        | 48,3              | Ex-Smoker      | 40         |
| ADC 5  | m   | 55               | RML                    | RML                    | pT3, pN0, pMx                                 | none                               | IIB                                    | pT2a, pN0, pMx / pT1a, pN0, pMx              | 1                        | 5,0               | Ex-Smoker      | n.i.       |
| ADC 6  | f   | 62               | RUL                    | RUL                    | pT3, pN1, pMx                                 | none                               | IIIA                                   | pT2a, pN1, pMx / pT2a, pN1, pMx              | 0                        | 57,7              | Smoker         | 45         |
| ADC 7  | m   | 68               | LUL                    | LUL                    | pT4, pN2, pMx                                 | none                               | IIIB                                   | pT2b, pN2, pMx / pT1a, pN2, pMx              | 0                        | 7,1               | Ex-Smoker      | 30         |
| ADC 8  | m   | 59               | LUL                    | LUL                    | pT3, pN2, pMx                                 | none                               | IIIA                                   | pT2b, pN2, pMx / pT1a, pN2, pMx              | 0                        | 1,3               | n.i.           | n.i.       |
| ADC 9  | m   | 73               | RUL                    | RUL                    | pT3, pN1, pMx                                 | none                               | IIIA                                   | pT2b, pN1, pMx / pT1a, pN1, pMx              | 0                        | 72,2              | Ex-Smoker      | 25         |
| ADC 10 | f   | 60               | LUL                    | LUL                    | pT3, pN0, pMx                                 | none                               | IIB                                    | pT1b, pN0, pMx / pT1a, pN0, pMx              | 1                        | 67,3              | Smoker         | 40         |
| ADC 11 | m   | 60               | RUL                    | RUL                    | pT3, pN0, pMx                                 | none                               | IIB                                    | pT2a, pN0, pMx / pT1a, pN0, pMx              | 0                        | 87,4              | Ex-Smoker      | 40         |
| ADC 12 | m   | 51               | LUL                    | LUL                    | pT3, pN0, pMx                                 | none                               | IIB                                    | pT1a, pN0, pMx / pT1a, pN0, pMx              | 0                        | 76,4              | Smoker         | 35         |
| ADC 13 | m   | 71               | RUL                    | RUL                    | pT3, pN2, pMx                                 | none                               | IIIA                                   | pT1b, pN2, pMx / pT1a, pN2, pMx              | 0                        | 46,7              | Ex-Smoker      | 60         |
| ADC 14 | f   | 61               | LUL                    | LUL                    | pT3, pN0, pMx                                 | none                               | IIB                                    | pT3, pN0, pMx / pT1a, pN0, pMx               | 1                        | 16,6              | Never-Smoker   | 0          |
| ADC 15 | m   | 55               | LUL                    | LUL                    | pT4, pN2, pMx                                 | none                               | IIIB                                   | pT2b, pN2, pMx / pT1a, pN2, pMx              | 0                        | 7,6               | Ex-Smoker      | 60         |
| ADC 16 | m   | 66               | RUL                    | RUL                    | pT3, pN0, pMx                                 | none                               | IIB                                    | pT1a, pN0, pMx / pT1a, pN0, pMx              | 0                        | 60,1              | Ex-Smoker      | 30         |
| ADC 17 | m   | 58               | RUL                    | RUL                    | pT3, pN2, pMx                                 | none                               | IIIA                                   | pT1b, pN2, pMx / pT1a, pN2, pMx              | 1                        | 7,3               | Ex-Smoker      | 10         |
| ADC 18 | m   | 52               | RUL                    | RUL                    | pT3, pN1, pMx                                 | none                               | IIIA                                   | pT1a, pN1, pMx / pT1a, pN1, pMx              | 1                        | 19,2              | n.i.           | n.i.       |
| ADC 19 | m   | 61               | RUL                    | RUL                    | pT3, pN2, pMx                                 | none                               | IIIA                                   | no change                                    | 1                        | 32,9              | Smoker         | 60         |
| ADC 20 | m   | 76               | RLL                    | RLL                    | pT3, pN0, M1                                  | none                               | IV                                     | no change                                    | 1                        | 6,7               | n.i.           | n.i.       |
| ADC 21 | m   | 56               | LUL                    | LUL                    | pT3, pN2, pMx                                 | none                               | IIIA                                   | no change                                    | 0                        | 42,4              | Smoker         | 50         |
| ADC 22 | m   | 77               | RLL                    | RLL                    | pT4, pN2, pMx                                 | none                               | IIIB                                   | no change                                    | 0                        | 4,0               | Ex-Smoker      | 40         |
| ADC 23 | f   | 60               | LLL                    | LLL                    | pT3, pN2, pMx                                 | none                               | IIIA                                   | no change                                    | 0                        | 49,2              | n.i.           | n.i.       |
| ADC 24 | f   | 60               | LLL                    | LLL                    | pT3, pN0, pMx                                 | none                               | IIB                                    | no change                                    | 1                        | 29,2              | Smoker         | 40         |
| ADC 25 | m   | 82               | LLL                    | LLL                    | pT3, pN1, M1a                                 | none                               | IV                                     | no change                                    | 0                        | 72,1              | Never-Smoker   | 0          |
| ADC 26 | m   | 47               | RUL                    | RUL                    | pT4, pN1, pMx                                 | none                               | IIIA                                   | no change                                    | 1                        | 4,4               | Smoker         | 40         |
| ADC 27 | m   | 46               | LUL                    | LUL                    | pT3, pN2, pMx                                 | none                               | IIIA                                   | no change                                    | 1                        | 6,5               | Ex-Smoker      | 70         |
| ADC 28 | m   | 69               | LLL                    | LLL                    | pT3, pN2, pMx                                 | none                               | IIIA                                   | no change                                    | 0                        | 19,6              | Ex-Smoker      | 40         |
| ADC 29 | f   | 45               | RUL                    | RUL                    | pT3, pN3, pMx                                 | none                               | IIIB                                   | no change                                    | 0                        | 0,5               | Ex-Smoker      | 30         |
| ADC 30 | f   | 70               | LUL                    | LUL                    | pT3, pN0, M1b                                 | brain                              | IV                                     | no change                                    | 1                        | 3,0               | Never Smoker   | 0          |
| ADC 31 | m   | 51               | RUL                    | RUL                    | pT4, pN2, M1                                  | none                               | IV                                     | no change                                    | 1                        | 2,2               | Smoker         | 60         |
| ADC 32 | m   | 68               | LUL                    | LUL                    | pT4, pN2, M1                                  | none                               | IV                                     | no change                                    | 1                        | 40,1              | n.i.           | n.i.       |
| ADC 33 | f   | 73               | RLL                    | RLL                    | pT3, pN2, pMx                                 | none                               | IIIA                                   | no change                                    | 1                        | 4,9               | Never-Smoker   | 0          |
| ADC 34 | m   | 41               | LUL                    | LUL                    | pT3, pN0, pMx                                 | none                               | IIB                                    | no change                                    | 0                        | 41,0              | Smoker         | 15         |
| ADC 35 | m   | 72               | LLL                    | LLL                    | pT4, pN1, pMx                                 | none                               | IIIA                                   | no change                                    | 0                        | 8,4               | Ex-Smoker      | 20         |
| ADC 36 | f   | 60               | RUL                    | RUL                    | pT4, pN2, pMx                                 | none                               | IIIB                                   | no change                                    | 0                        | 7,0               | Ex-Smoker      | n.i.       |
| ADC 37 | f   | 69               | RUL                    | RUL                    | pT4, pN1, pMx                                 | none                               | IIIA                                   | no change                                    | 0                        | 6,3               | Never-Smoker   | 0          |
| ADC 38 | m   | 80               | RML                    | RML                    | pT3, pN0, pMx                                 | none                               | IIB                                    | no change                                    | 0                        | 6,3               | Ex-Smoker      | 60         |
| ADC 39 | f   | 62               | LUL                    | LUL                    | pT3, pN2, pMx                                 | none                               | IIIA                                   | no change                                    | 0                        | 12,5              | Never-Smoker   | 0          |
| ADC 40 | m   | 70               | LUL                    | LUL                    | pT3, pN2, pMx                                 | none                               | IIIA                                   | no change                                    | 1                        | 16,6              | Ex-Smoker      | 35         |
| ADC 41 | f   | 51               | RUL                    | RUL                    | pT3, pN2, pMx                                 | none                               | IIIA                                   | no change                                    | 0                        | 0,6               | Smoker         | n.i.       |
| ADC 42 | m   | 69               | LUL                    | LUL                    | pT3, pN0, pMx                                 | none                               | IIB                                    | no change                                    | 1                        | 39,2              | Ex-Smoker      | 50         |
| ADC 43 | m   | 81               | LLL                    | LLL                    | pT3, pN2, pMx                                 | none                               | IIIA                                   | no change                                    | 0                        | 68,8              | n.i.           | n.i.       |
| ADC 44 | m   | 60               | RLL                    | RLL                    | pT3, pN2, pMx                                 | none                               | IIIA                                   | no change                                    | 0                        | 0,6               | Never-Smoker   | 0          |
| ADC 45 | f   | 48               | RLL                    | RLL                    | pT3, pN0, pMx                                 | none                               | IIB                                    | no change                                    | 0                        | 53,7              | Ex-Smoker      | 1          |
| ADC 46 | f   | 59               | LLL                    | LLL                    | pT3, pN0, pMx                                 | none                               | IIB                                    | no change                                    | 0                        | 55,3              | Ex-Smoker      | 6          |
| ADC 47 | m   | 58               | RLL                    | RUL                    | pT3, pN0, pMx                                 | none                               | IIB                                    | no change                                    | 1                        | 35,0              | Smoker         | 50         |
| ADC 48 | m   | 77               | RLL                    | RML                    | pT4, pN2, pMx                                 | none                               | IIIB                                   | no change                                    | 1                        | 20,4              | Ex-Smoker      | 30         |
| ADC 49 | m   | 64               | LUL                    | LLL                    | pT3, pN1, pMx                                 | none                               | IIIA                                   | no change                                    | 1                        | 4,3               | Ex-Smoker      | 70         |
| ADC 50 | m   | 47               | RML                    | RUL                    | pT3, pN2, M1b                                 | adrenal gland                      | IV                                     | no change                                    | 1                        | 20,8              | Smoker         | 35         |
| ADC 51 | m   | 43               | RUL                    | RLL                    | pT3, pN2, pMx                                 | none                               | IIIA                                   | no change                                    | 1                        | 12,4              | Ex-Smoker      | 20         |
| ADC 52 | m   | 66               | RML                    | RUL                    | pT3, pN0, pMx                                 | none                               | IIB                                    | no change                                    | 1                        | 9,0               | Smoker         | 25         |
| ADC 53 | m   | 60               | RML                    | RUL                    | pT3, pN0, pMx                                 | none                               | IIB                                    | no change                                    | 0                        | 0,4               | Ex-Smoker      | 40         |

|      |    |   |    |     |     |                 |      |      |                                 |   |      |              |      |
|------|----|---|----|-----|-----|-----------------|------|------|---------------------------------|---|------|--------------|------|
| ADC  | 54 | m | 67 | LUL | LLL | pT3, pN0, pMx   | none | IIB  | no change                       | 1 | 77,9 | Ex-Smoker    | 40   |
| ADC  | 55 | m | 70 | RLL | RUL | pT3, pN1, pMx   | none | IIIA | no change                       | 0 | 20,4 | Ex-Smoker    | 100  |
| ADC  | 56 | m | 70 | LUL | LLL | pT3, pN0, pMx   | none | IIB  | no change                       | 0 | 36,4 | Ex-Smoker    | 20   |
| ADC  | 57 | m | 79 | LLL | LUL | pT3, pN1, pMx   | none | IIIA | no change                       | 1 | 26,8 | Ex-Smoker    | n.i. |
| ADC  | 58 | f | 59 | RML | RUL | pT3, pN0, pMx   | none | IIB  | no change                       | 0 | 0,3  | Never-Smoker | 0    |
| SQCC | 59 | f | 64 | RUL | LUL | pT3, pN3, M1a   | none | IV   | pT3, pN3, M1a / pT1a, pN3, M1a  | 1 | 10,9 | Ex-Smoker    | 90   |
| SQCC | 60 | m | 63 | LLL | LLL | pT3, pN0, pMx   | none | IIB  | pT2a, pN0, pMx / pT1a, pN0, pMx | 1 | 14,9 | Ex-Smoker    | n.i. |
| SQCC | 61 | m | 53 | LUL | LUL | pT4, pN0, pMx   | none | IIIA | pT2a, pN0, pMx / pT1a, pN0, pMx | 0 | 45,7 | Ex-Smoker    | 50   |
| SQCC | 62 | m | 76 | LUL | LUL | pT4, pN0, pMx   | none | IIIA | pT2a, pN0, pMx / pT1a, pN0, pMx | 0 | 1,3  | Ex-Smoker    | 50   |
| SQCC | 63 | m | 76 | RUL | RUL | pT3, pN0, pMx   | none | IIB  | pT2b, pN0, pMx / pT1a, pN0, pMx | 1 | 13,3 | Ex-Smoker    | 55   |
| SQCC | 64 | m | 79 | LUL | LUL | pT3, pN0, pMx   | none | IIB  | pT1a, pN0, pMx / pT1a, pN0, pMx | 0 | 52,5 | Ex-Smoker    | n.i. |
| SQCC | 65 | m | 74 | RLL | RLL | pT4, pN1, M1a   | none | IV   | pT3, pN1, M1a / pT1a, pN1, M1a  | 0 | 25,8 | Ex-Smoker    | n.i. |
| SQCC | 66 | m | 70 | RUL | RUL | pT3, pN0, pMx   | none | IIB  | pT2b, pN0, pMx / pT1a, pN0, pMx | 0 | 10,2 | Ex-Smoker    | 40   |
| SQCC | 67 | m | 69 | LLL | LLL | pT3, pN0, pMx   | none | IIB  | pT1b, pN0, pMx / pT1a, pN0, pMx | 0 | 72,6 | Ex-Smoker    | 80   |
| SQCC | 68 | m | 55 | RML | RML | pT3, pN0, pMx   | none | IIB  | pT2a, pN0, pMx / pT1a, pN0, pMx | 0 | 0,5  | Ex-Smoker    | n.i. |
| SQCC | 69 | m | 69 | LLL | LLL | pT4, pN1, pMx   | none | IIIA | no change                       | 1 | 4,6  | Ex-Smoker    | 150  |
| SQCC | 70 | m | 84 | LLL | LLL | pT3, pN1, pMx   | none | IIIA | no change                       | 1 | 13,6 | Ex-Smoker    | 50   |
| SQCC | 71 | m | 53 | RUL | RUL | pT3, pN2, pMx   | none | IIIA | no change                       | 0 | 45,2 | Ex-Smoker    | n.i. |
| SQCC | 72 | m | 72 | LUL | LUL | pT2b, pN0, pM1a | none | IV   | no change                       | 1 | 34,2 | Ex-Smoker    | 40   |
| SQCC | 73 | m | 72 | LUL | LLL | pT4, pN2, M1a   | none | IV   | no change                       | 1 | 21,0 | Ex-Smoker    | 50   |
| SQCC | 74 | m | 77 | RUL | RML | pT4, pN0, pMx   | none | IIIA | no change                       | 0 | 1,3  | Smoker       | 60   |
| SQCC | 75 | f | 73 | RLL | RUL | pT3, pN1, pMx   | none | IIIA | no change                       | 0 | 55,3 | Smoker       | 20   |
| SQCC | 76 | m | 61 | RUL | RML | pT3, pN2, pMx   | none | IIIA | no change                       | 0 | 68,0 | Smoker       | n.i. |
| SQCC | 77 | m | 68 | LUL | LLL | pT3, pN2, pMx   | none | IIIA | no change                       | 1 | 3,3  | Ex-Smoker    | 35   |
| SQCC | 78 | m | 56 | RUL | RML | pT3, pN0, M1a   | none | IV   | no change                       | 1 | 15,4 | Ex-Smoker    | 30   |

**Table S1:** Clinicopathologic characteristics of the analyzed NSCLC.

ADC = adenocarcinoma; SQCC = squamous cell carcinoma; f = female; m = male;

RUL = right upper lobe; RML = right middle lobe; RLL = right lower lobe; LLL = left

lower lobe; LUL = left upper lobe, n.i. = no information.
